# Supplementary material
Source: publisher site journal article supplement (https://www.dovepress.com/article/373853)
Supplement: Supplementary file 1 [file get_supplementary_file.php]

**Supplementary material**

**Tables**

**Table S1.** Detailed comorbidities according to the fixed ratio (FEV1/FVC <0.7)

|  | **TOTAL**  **n=164** | **COPD**  **n=56** | **Non-COPD**  **n=108** | **P-value** |
| --- | --- | --- | --- | --- |
| Previous myocardial infarction | 66 (40.2%) | 25 (15.2%) | 41 (38%) | 0.50 |
| Heart failure | 41 (25%) | 18 (30.4%) | 24 (22.2%) | 0.26 |
| Peripheral artery disease | 24 (14.6%) | 13 (23.2%) | 11 (10.2%) | 0.03 |
| Diabetes mellitus | 66 (40.2%) | 24 (42.9%) | 42 (38.9%) | 0.74 |
| Arterial hypertension | 111 (68 %) | 35 (62.5%) | 76 (70.4%) | 0.23 |
| Dyslipidemia | 113 (68.9%) | 43 (76.8%) | 70 (64.8%) | 0.16 |
| Arrhythmia | 20 (12.2%) | 12 (21.4%) | 8 (7.4%) | 0.01 |
| Mood disorders | 50 (30.5%) | 17 (30.4%) | 33 (30.6%) | 1 |
| Previous angina | 77 (47%) | 25 (44.6%) | 52 (48.1%) | 0.74 |
| Previous PCI | 59 (36%) | 21 (37.5%) | 38 (35,2%) | 0.86 |
| Anemia | 18 (11.1%) | 8 (14.5%) | 10 (9.3%) | 0.43 |

*PCI=percutaneous coronary intervention. ** Described through median and interquartile range (IQR) 25-75%.*

**Table S2**

Table S4.

Detailed differences in variables between cluster groups.

**Figures**

**
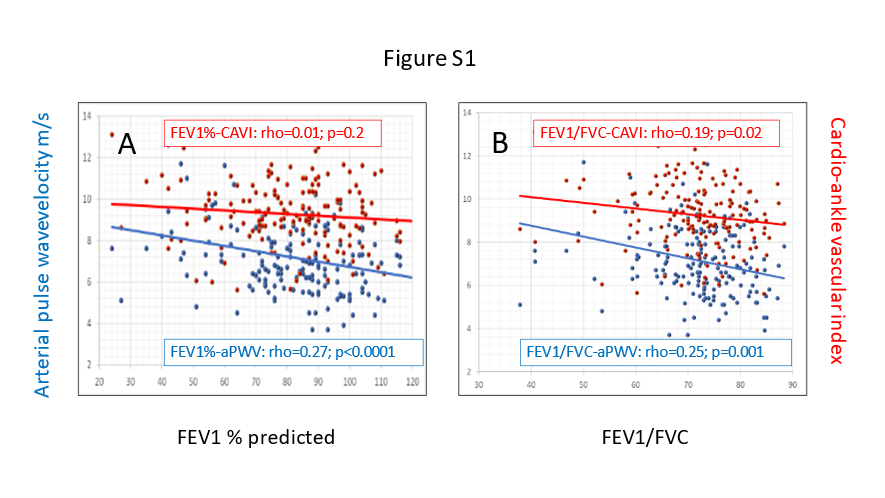
**

**Figure S1.** Scatter diagram of arterial pulse wave velocity (aPWV; blue) and cardio-ankle vascular index (CAVI; red) with FEV1% (A) and FEV1/FVC
